# Supplementary material
Source: PubMed Central journal article supplement (PMC5134156)
Supplement: HESR-51-2282-s002.pdf [file HESR-51-2282-s002.pdf]

**An evaluation of performance thresholds in nursing home pay-for-performance**

Rachel M. Werner, Meghan Skira, R. Tamara Konetzka

**Appendix Tables**

**Appendix Table 1.** Results of tests for differences in trends of nursing home performance prior to implementation of P4P. To test for differences in trends we regressed nursing home performance on linear time trends, a dummy variable indicating whether the state implemented P4P, and the interaction between the two. The coefficients on the interactions between the time trend and the P4P indicator are shown below. Regressions were limited to the four quarters prior to P4P implementation in each state.

|                                         | Pain            | Pressure sores  | Physically restrained | Falls           | Catheter inserted | Weight loss    |
|-----------------------------------------|-----------------|-----------------|-----------------------|-----------------|-------------------|----------------|
| Colorado<br>(vs. Arizona)               | -.010<br>(.042) | .013<br>(.050)  | .020<br>(.043)        | -.010<br>(.055) |                   |                |
| Georgia<br>(vs. Tennessee)              | -.036<br>(.031) | -.010<br>(.033) | -.047*<br>(.027)      |                 |                   |                |
| Oklahoma<br>(vs. Arkansas)              |                 | -.034<br>(.036) | -.034<br>(.035)       | .022<br>(.035)  | .001<br>(.038)    | .001<br>(.035) |
| All states<br>(vs. 3 comparison states) | -.027<br>(.019) | -.016<br>(.022) | -.030<br>(.020)       |                 |                   |                |

Robust standard errors in parentheses

\* p<0.05

**Appendix Table 2.** Regression results showing the main effect of P4P on nursing home performance for each state individually (compared to its comparator state) and for the three states combined.

|                                         | Pain                | Pressure sores      | Physically restrained  | Falls               | Catheter inserted  | Weight loss        |
|-----------------------------------------|---------------------|---------------------|------------------------|---------------------|--------------------|--------------------|
| Colorado<br>(vs. Arizona)               | 0.0184<br>(0.0691)  | -0.1205<br>(0.0680) | 0.0929**<br>(0.0468)   | -0.0710<br>(.0951)  |                    |                    |
| Georgia<br>(vs. Tennessee)              | -0.0021<br>(0.0467) | -0.1286<br>(0.0541) | -0.1282***<br>(0.0465) |                     |                    |                    |
| Oklahoma<br>(vs. Arkansas)              |                     | -0.0181<br>(0.0605) | 0.1389***<br>(0.0518)  | 0.0955*<br>(0.0561) | 0.0339<br>(0.0461) | 0.0453<br>(0.0575) |
| All states<br>(vs. 3 comparison states) | -0.003<br>(0.038)   | -0.071**<br>(0.034) | 0.005<br>(0.030)       |                     |                    |                    |

Robust standard errors in parentheses

\* p<0.10, \*\* p<0.05, \*\*\* p<0.01

Note: Each coefficient represents the main effect of P4P from a separate regression. In each state we test only those performance measures included in that state's P4P program. In the combined (all states) specification, we test the three performance measures we focus on in this paper.

**Appendix Table 3.** Regression results comparing Colorado (using the higher pre-determined thresholds in their P4P program) to Arizona

|                 | Pain                | Pressure Sores       | Restraints            | Falls                |
|-----------------|---------------------|----------------------|-----------------------|----------------------|
| p4p             | 0.128<br>(0.117)    | -0.136<br>(0.125)    | 0.147***<br>(0.0342)  | -0.112<br>(0.168)    |
| Quantile 2      | 0.207*<br>(0.124)   | 0.166**<br>(0.0798)  | 0.0220<br>(0.0310)    | 0.319***<br>(0.0863) |
| Quantile 3      | 0.232*<br>(0.125)   | 0.303***<br>(0.0737) | 0.0897***<br>(0.0279) | 0.737***<br>(0.0892) |
| Quantile 4      | 0.390***<br>(0.128) | 0.478***<br>(0.0697) | 0.171***<br>(0.0232)  | 0.970***<br>(0.123)  |
| Quantile 5      | 0.756***<br>(0.132) | 0.788***<br>(0.0729) | 0.523***<br>(0.0300)  | 1.229***<br>(0.121)  |
| Quantile 6      | 1.471***<br>(0.145) | 1.466***<br>(0.114)  | 1.129***<br>(0.0757)  | 2.067***<br>(0.221)  |
| p4p*Quantile 2  | -0.0977<br>(0.113)  | 0.166<br>(0.161)     | -0.0228<br>(0.0387)   | 0.125<br>(0.162)     |
| p4p*Quantile 3  | -0.0782<br>(0.125)  | 0.0659<br>(0.113)    | -0.0406<br>(0.0468)   | 0.0289<br>(0.156)    |
| p4p*Quantile 4  | -0.0334<br>(0.113)  | 0.0622<br>(0.114)    | -0.0380<br>(0.0316)   | 0.222<br>(0.170)     |
| p4p*Quantile 5  | -0.162<br>(0.114)   | 0.0835<br>(0.117)    | -0.149***<br>(0.0329) | 0.135<br>(0.172)     |
| p4p*Quantile 6  | -0.127<br>(0.136)   | 0.0187<br>(0.162)    | -0.115<br>(0.120)     | 0.113<br>(0.214)     |
| Constant        | 0.686<br>(1.163)    | -1.731<br>(2.484)    | -1.822***<br>(0.665)  | -1.313<br>(3.659)    |
| Covariates      | Yes                 | Yes                  | Yes                   | Yes                  |
| Quarter FE      | Yes                 | Yes                  | Yes                   | Yes                  |
| Nursing Home FE | Yes                 | Yes                  | Yes                   | Yes                  |
| N               | 2606                | 2599                 | 2606                  | 2591                 |
| adj. R-squared  | 0.220               | 0.160                | 0.253                 | 0.147                |

Robust standard errors in parentheses

\* p<0.10, \*\* p<0.05, \*\*\* p<0.01

Note: Nursing homes in quantile 1 (the omitted category) are farthest above the threshold and thus, the highest performers. The threshold is between quantiles 3 and 4. Nursing homes in quantile 6 are farthest below the threshold and thus, the lowest performers.

**Appendix Table 4.** Regression results comparing Georgia (using average performance in the state as the threshold in their P4P program) to Tennessee

|                 | Pain                  | Pressure Sores        | Restraints            |
|-----------------|-----------------------|-----------------------|-----------------------|
| p4p             | 0.278***<br>(0.0720)  | 0.251***<br>(0.0905)  | 0.0861<br>(0.0576)    |
| Quantile 2      | -0.0836*<br>(0.0460)  | -0.107*<br>(0.0644)   | 0.00696<br>(0.0769)   |
| Quantile 3      | -0.118*<br>(0.0620)   | -0.185**<br>(0.0765)  | 0.00261<br>(0.0881)   |
| Quantile 4      | -0.0399<br>(0.0644)   | -0.230***<br>(0.0810) | 0.0515<br>(0.0964)    |
| Quantile 5      | -0.116*<br>(0.0676)   | -0.398***<br>(0.0837) | 0.0613<br>(0.103)     |
| Quantile 6      | -0.314***<br>(0.114)  | -0.512***<br>(0.126)  | 0.0981<br>(0.149)     |
| p4p*Quantile 2  | -0.122<br>(0.0744)    | -0.277***<br>(0.0977) | -0.0471<br>(0.0585)   |
| p4p*Quantile 3  | -0.267***<br>(0.0871) | -0.251**<br>(0.115)   | -0.0559<br>(0.0704)   |
| p4p*Quantile 4  | -0.292***<br>(0.112)  | -0.469***<br>(0.126)  | -0.130*<br>(0.0717)   |
| p4p*Quantile 5  | -0.447***<br>(0.0932) | -0.362***<br>(0.110)  | -0.320***<br>(0.0619) |
| p4p*Quantile 6  | -0.608***<br>(0.184)  | -0.889***<br>(0.151)  | -0.760***<br>(0.108)  |
| Constant        | 3.817<br>(3.056)      | -5.505*<br>(3.068)    | 1.191<br>(1.341)      |
| Covariates      | Yes                   | Yes                   | Yes                   |
| Quarter FE      | Yes                   | Yes                   | Yes                   |
| Nursing Home FE | Yes                   | Yes                   | Yes                   |
| N               | 5140                  | 5115                  | 5140                  |
| adj. R-squared  | 0.114                 | 0.092                 | 0.086                 |

Robust standard errors in parentheses

\* p<0.10, \*\* p<0.05, \*\*\* p<0.01

Note: Nursing homes in quantile 1 (the omitted category) are farthest above the threshold and thus, the highest performers. The threshold is between quantiles 3 and 4. Nursing homes in quantile 6 are farthest below the threshold and thus, the lowest performers.

**Appendix Table 5.** Regression results comparing Oklahoma (using thresholds based on median performance in their P4P program) to Arkansas

|                 | Composite            | Pressure Sores       | Restraints           | Falls                 | Catheter             | Weight loss          |
|-----------------|----------------------|----------------------|----------------------|-----------------------|----------------------|----------------------|
| p4p             | 0.590***<br>(0.176)  | 0.352***<br>(0.134)  | 0.462***<br>(0.114)  | 0.326**<br>(0.154)    | 0.122<br>(0.0963)    | 0.265**<br>(0.108)   |
| Quantile 2      | -0.307**<br>(0.130)  | -0.0303<br>(0.0828)  | 0.00725<br>(0.0726)  | -0.132<br>(0.0813)    | -0.170**<br>(0.0754) | 0.0480<br>(0.0901)   |
| Quantile 3      | -0.275*<br>(0.147)   | -0.0173<br>(0.0983)  | 0.110<br>(0.0877)    | -0.200**<br>(0.0990)  | -0.0348<br>(0.0862)  | -0.0110<br>(0.106)   |
| Quantile 4      | -0.337**<br>(0.162)  | -0.0666<br>(0.110)   | 0.0794<br>(0.0913)   | -0.252**<br>(0.0984)  | -0.133<br>(0.0878)   | 0.0950<br>(0.120)    |
| Quantile 5      | -0.564***<br>(0.151) | -0.0798<br>(0.111)   | -0.0378<br>(0.0926)  | -0.306***<br>(0.0997) | -0.104<br>(0.0920)   | -0.0662<br>(0.138)   |
| Quantile 6      | -0.633***<br>(0.170) | -0.196<br>(0.138)    | -0.0224<br>(0.112)   | -0.358***<br>(0.114)  | -0.0654<br>(0.101)   | -0.121<br>(0.138)    |
| p4p*Quantile 2  | -0.226<br>(0.195)    | -0.301**<br>(0.150)  | -0.233*<br>(0.125)   | -0.140<br>(0.175)     | 0.0926<br>(0.111)    | -0.0762<br>(0.137)   |
| p4p*Quantile 3  | -0.427*<br>(0.222)   | -0.169<br>(0.197)    | -0.605***<br>(0.170) | -0.200<br>(0.178)     | -0.142<br>(0.132)    | 0.0132<br>(0.154)    |
| p4p*Quantile 4  | -0.929***<br>(0.221) | -0.477**<br>(0.197)  | -0.390**<br>(0.155)  | -0.245<br>(0.218)     | -0.0159<br>(0.129)   | -0.476***<br>(0.159) |
| p4p*Quantile 5  | -0.706***<br>(0.188) | -0.509***<br>(0.159) | -0.228*<br>(0.132)   | -0.154<br>(0.177)     | -0.229<br>(0.144)    | -0.303*<br>(0.155)   |
| p4p*Quantile 6  | -0.983***<br>(0.197) | -0.512***<br>(0.172) | -0.477***<br>(0.168) | -0.434**<br>(0.174)   | -0.185<br>(0.126)    | -0.356**<br>(0.172)  |
| Constant        | 1.160<br>(1.005)     | 0.775<br>(1.737)     | -0.200<br>(1.204)    | -0.529<br>(1.218)     | 1.797<br>(2.156)     | -2.359<br>(1.731)    |
| Covariates      | Yes                  | Yes                  | Yes                  | Yes                   | Yes                  | Yes                  |
| Quarter FE      | Yes                  | Yes                  | Yes                  | Yes                   | Yes                  | Yes                  |
| Nursing Home FE | Yes                  | Yes                  | Yes                  | Yes                   | Yes                  | Yes                  |
| N               | 4071                 | 4064                 | 4071                 | 4045                  | 4050                 | 4067                 |
| adj. R-squared  | 0.178                | 0.022                | 0.206                | 0.022                 | 0.119                | 0.035                |

Robust standard errors in parentheses

\* p<0.10, \*\* p<0.05, \*\*\* p<0.01

Note: Nursing homes in quantile 1 (the omitted category) are farthest above the threshold and thus, the highest performers. The threshold is between quantiles 3 and 4. Nursing homes in quantile 6 are farthest below the threshold and thus, the lowest performers.

**Appendix Table 6.** Regression results using a false P4P implementation date (one year prior to the actual P4P implementation in each state).

|                      | Pain                 | Pressure Sores        | Restraints            |
|----------------------|----------------------|-----------------------|-----------------------|
| False P4P indicator  | -0.00899<br>(0.0528) | 0.191***<br>(0.0536)  | -0.0601**<br>(0.0274) |
| Quantile 2           | 0.0400<br>(0.0668)   | -0.0182<br>(0.0593)   | 0.101**<br>(0.0450)   |
| Quantile 3           | 0.117<br>(0.0806)    | 0.0323<br>(0.0706)    | 0.184***<br>(0.0575)  |
| Quantile 4           | -0.00222<br>(0.0850) | -0.0362<br>(0.0698)   | 0.115**<br>(0.0528)   |
| Quantile 5           | 0.230**<br>(0.0931)  | -0.0338<br>(0.0703)   | 0.177***<br>(0.0574)  |
| Quantile 6           | 0.730***<br>(0.145)  | 0.277***<br>(0.0914)  | 0.401***<br>(0.0735)  |
| False p4p*Quantile 2 | -0.0107<br>(0.0676)  | -0.0497<br>(0.0679)   | -0.0113<br>(0.0380)   |
| False p4p*Quantile 3 | -0.103<br>(0.0743)   | -0.115<br>(0.0727)    | -0.059<br>(0.0511)    |
| False p4p*Quantile 4 | -0.163**<br>(0.0674) | -0.227***<br>(0.0678) | -0.156***<br>(0.0456) |
| False p4p*Quantile 5 | -0.124<br>(0.0621)   | -0.152<br>(0.0692)    | -0.020*<br>(0.0103)   |
| False p4p*Quantile 6 | -0.198<br>(0.0922)   | -0.156<br>(0.0826)    | -0.114<br>(0.0551)    |
| Constant             | 3.396*<br>(1.929)    | -0.455<br>(1.257)     | -2.402**<br>(1.069)   |
| Covariates           | Yes                  | Yes                   | Yes                   |
| Quarter FE           | Yes                  | Yes                   | Yes                   |
| Nursing Home FE      | Yes                  | Yes                   | Yes                   |
| N                    | 7753                 | 11808                 | 11859                 |
| adj. R-squared       | 0.095                | 0.047                 | 0.079                 |

Robust standard errors in parentheses

\* p<0.10, \*\* p<0.05, \*\*\* p<0.01

Note: Nursing homes in quantile 1 (the omitted category) are farthest above the threshold and thus, the highest performers. The threshold is between quantiles 3 and 4. Nursing homes in quantile 6 are farthest below the threshold and thus, the lowest performers.
